# Supplementary material for: Derivation of a Contextually-Appropriate COVID-19 Mortality Scale for Low-Resource Settings
Source: PubMed Central journal article supplement (PMC7996452; doi:10.5334/aogh.3278), 2021-03-26
Supplement: agh-87-1-3278-s1.pdf [file agh-87-1-3278-s1.pdf]

## Appendices

### Appendix 1: Evidence for inclusion of candidate variables.

| Variable                     | Evidence                                                                                                                                                                                                                                                                             | Inclusion decision                                                                                           |
|------------------------------|--------------------------------------------------------------------------------------------------------------------------------------------------------------------------------------------------------------------------------------------------------------------------------------|--------------------------------------------------------------------------------------------------------------|
| <b>DEMOGRAPHICS</b>          |                                                                                                                                                                                                                                                                                      |                                                                                                              |
| Age (years)                  | A-DROP, <sup>1</sup> APACHE II, <sup>2</sup> COVID-GRAM, <sup>3</sup> CURB-65, <sup>4,5</sup> MuLBSTA, <sup>6</sup> PSI, <sup>4</sup> SMART-COP, <sup>7</sup> 4C <sup>5,8</sup>                                                                                                      | Included                                                                                                     |
| Male sex at birth            | A-DROP, <sup>1</sup> PSI, <sup>4</sup> 4C, <sup>5,8</sup> pOR: 1.35 (95% CI [1.21-1.50]) <sup>9</sup>                                                                                                                                                                                | Included                                                                                                     |
| <b>COMORBIDITIES*</b>        |                                                                                                                                                                                                                                                                                      |                                                                                                              |
| Alcohol use                  | pOR: 1.56 (95% CI [0.70, 3.45]) <sup>9</sup>                                                                                                                                                                                                                                         | Included in composite "Total no. comorbidities" variable                                                     |
| Cardiovascular disease       | PSI (congestive heart failure), <sup>4</sup> 4C (chronic cardiac disease) <sup>5,8</sup>                                                                                                                                                                                             | Included in composite "Total no. comorbidities" variable                                                     |
| Chronic respiratory disease  | 4C (chronic pulmonary disease, excluding asthma), <sup>5,8</sup> pOR for chronic obstructive pulmonary disease, asthma, interstitial lung disease, and pulmonary hypertension: 1.89 (95% CI [1.50, 2.38]); <sup>9</sup> pOR for tuberculosis: 2.68 (95% CI[0.91, 7.85]) <sup>9</sup> | Included in composite "Total no. comorbidities" variable                                                     |
| Chronic neurological disease | PSI (cerebrovascular disease), <sup>4</sup> pOR for stroke: 3.08 (95% CI[1.95, 4.88]) <sup>9</sup>                                                                                                                                                                                   | Included in composite "Total no. comorbidities" variable                                                     |
| Cirrhosis                    | PSI, <sup>4</sup> 4C (liver disease), <sup>5,8</sup> pOR: 1.94 (95% CI [1.07, 3.51]) <sup>9</sup>                                                                                                                                                                                    | Included in composite "Total no. comorbidities" variable                                                     |
| Chronic kidney disease       | PSI, <sup>4</sup> 4C, <sup>5,8</sup> pOR: 2.55 (95% CI [1.52-4.29]) <sup>9</sup>                                                                                                                                                                                                     | Included in composite "Total no. comorbidities" variable                                                     |
| Current or former smoker     | MuLBSTA, <sup>6</sup> pOR: 1.49 (95% CI [1.17, 1.90]) <sup>9</sup>                                                                                                                                                                                                                   | Included in composite "Total no. comorbidities" variable                                                     |
| Current pregnancy            | No evidence identified                                                                                                                                                                                                                                                               | Excluded due to lack of evidence and excessive missingness in derivation dataset (65.4% missing for females) |
| Diabetes (types 1 and 2)     | 4C, <sup>5,8</sup> pOR: 1.72 (95% CI [1.45, 2.03]) <sup>9</sup>                                                                                                                                                                                                                      | Included in composite "Total no. comorbidities" variable                                                     |
| Hypertension                 | MuLBSTA, <sup>6</sup> pOR: 2.14 (95% CI[ 1.82, 2.51]) <sup>9</sup>                                                                                                                                                                                                                   | Included in composite "Total no. comorbidities" variable                                                     |

|                                           |                                                                                           |                                                          |
|-------------------------------------------|-------------------------------------------------------------------------------------------|----------------------------------------------------------|
| Hypothyroid                               | COVID-GRAM, <sup>3</sup> pOR for thyroid disease: 1.58 (95% CI [0.46, 5.42]) <sup>9</sup> | Included in composite "Total no. comorbidities" variable |
| Malignancy                                | PSI, <sup>4</sup> 4C, <sup>5,8</sup> pOR: 1.74 (95% CI [1.10, 2.74]) <sup>9</sup>         | Included in composite "Total no. comorbidities" variable |
| Rheumatological/connective tissue disease | No evidence identified                                                                    | Excluded due to lack of evidence                         |
| Total no. comorbidities                   | COVID-GRAM, <sup>3</sup> 4C, <sup>5,8</sup> pOR: 2.41 (95% CI [2.01, 2.89]) <sup>9</sup>  | Included                                                 |

---

#### PRESENTING SIGNS & SYMPTOMS

---

|                                  |                                                                                                                               |                                  |
|----------------------------------|-------------------------------------------------------------------------------------------------------------------------------|----------------------------------|
| Abdominal pain and/or distention | pOR: 1.58 (95% CI [1.12, 2.22]) <sup>9</sup>                                                                                  | Included                         |
| Anorexia, nausea, or vomiting    | pOR for anorexia: 1.61 (95% CI [1.26, 2.06]); <sup>9</sup> pOR for vomiting: 1.52 (95% CI [1.11, 2.10]) <sup>9</sup>          | Included                         |
| Anosmia                          | No evidence identified                                                                                                        | Excluded due to lack of evidence |
| Chest pain or tightness          | pOR for chest tightness: 1.62 (95% CI [1.11, 2.37]); <sup>9</sup> pOR for chest pain: 1.55 (95% CI [0.80, 3.01]) <sup>9</sup> | Included                         |
| Convulsions                      | No evidence identified                                                                                                        | Excluded due to lack of evidence |
| Cough                            | A-DROP, <sup>1</sup> pOR: 1.08 (95% CI [0.96, 1.23]) <sup>9</sup>                                                             | Included                         |
| Diarrhoea                        | pOR: 1.10 (95% CI [0.95, 1.27]) <sup>9</sup>                                                                                  | Included                         |
| Fatigue                          | pOR: 1.22 (95% CI [1.02, 1.45]) <sup>9</sup>                                                                                  | Included                         |
| Fever                            | pOR: 1.22 (95% CI [1.08, 1.38]) <sup>9</sup>                                                                                  | Included                         |
| Headache                         | No evidence identified                                                                                                        | Excluded due to lack of evidence |
| Internal bleeding                | COVID-GRAM, <sup>3</sup> pOR for haemoptysis: 1.51 (95% CI [0.82, 2.78]) <sup>9</sup>                                         | Included                         |
| Myalgia                          | No evidence identified                                                                                                        | Excluded due to lack of evidence |
| Shortness of breath              | COVID-GRAM, <sup>3</sup> pOR: 2.78 (95% CI [2.24, 3.46]) <sup>9</sup>                                                         | Included                         |
| Sore throat                      | No evidence identified                                                                                                        | Excluded due to lack of evidence |

---

#### VITAL SIGNS

---

|                        |                                                                                                                                 |          |
|------------------------|---------------------------------------------------------------------------------------------------------------------------------|----------|
| Glasgow Coma Scale     | APACHE II, <sup>2</sup> NEWS2, <sup>10</sup> PSI, <sup>4</sup> qSOFA, <sup>5,8,11</sup> 4C <sup>5,8</sup>                       | Included |
| Heart rate (beats/min) | APACHE II, <sup>2</sup> NEWS, <sup>5,11</sup> NEWS2, <sup>10</sup> PSI, <sup>4</sup> SIRS, <sup>11</sup> SMART-COP <sup>7</sup> | Included |

|                                |                                                                                                                                                                                                                                                |                                                                        |
|--------------------------------|------------------------------------------------------------------------------------------------------------------------------------------------------------------------------------------------------------------------------------------------|------------------------------------------------------------------------|
| Peripheral oxygen saturation   | A-DROP, <sup>1</sup> BCRSS, <sup>12,13</sup> NEWS, <sup>5,11</sup> NEWS2, <sup>10</sup> qCSI, <sup>14</sup> 4C <sup>5,8</sup>                                                                                                                  | Included                                                               |
| Systolic blood pressure (mmHg) | CURB-65, <sup>4,5</sup> NEWS, <sup>5,11</sup> NEWS2, <sup>10</sup> PSI, <sup>4</sup> qSOFA, <sup>5,8,11</sup> SMART-COP <sup>7</sup>                                                                                                           | Included                                                               |
| Respiratory rate (breaths/min) | APACHE II, <sup>2</sup> BCRSS, <sup>12,13</sup> CURB65, <sup>4,5</sup> NEWS, <sup>5,11</sup> NEWS2, <sup>10</sup> PSI, <sup>4</sup> qCSI, <sup>14</sup> qSOFA, <sup>5,8,11</sup> SIRS, <sup>11</sup> SMART-COP, <sup>7</sup> 4C <sup>5,8</sup> | Included                                                               |
| Temperature (°C)               | APACHE II, <sup>2</sup> NEWS, <sup>5,11</sup> NEWS2, <sup>10</sup> PSI, <sup>4</sup> SIRS <sup>11</sup>                                                                                                                                        | Excluded - excessive missingness in derivation dataset (86.7% missing) |

**Appendix 2.** Variable selection using generalised additive models.<sup>5</sup>

| Variable                            | Model for settings <i>with</i> access to pulse oximetry |                        |                        |                        |                        | Model for settings <i>without</i> access to pulse oximetry |                                                                |                |                                    |                          |
|-------------------------------------|---------------------------------------------------------|------------------------|------------------------|------------------------|------------------------|------------------------------------------------------------|----------------------------------------------------------------|----------------|------------------------------------|--------------------------|
|                                     | Deviance explained (%)                                  | Deviance explained (%) | Deviance explained (%) | Deviance explained (%) | Deviance explained (%) | Deviance explained (%)                                     | Reduction in deviance explained on removal from full model (%) | R <sup>2</sup> | Area under receiver operator curve | Inclusion in final model |
| <b>ALL CANDIDATE VARIABLES</b>      | 45                                                      | 35.9                   | 35.9                   | 35.9                   | 35.9                   | 35.9                                                       | -                                                              | 0.471          | 0.879                              |                          |
| Male sex at birth                   | 44.3                                                    | 34.7                   | 34.7                   | 34.7                   | 34.7                   | 34.7                                                       | 0.7                                                            | 0.466          | 0.877                              | Include                  |
| Age (years)                         | 42.8                                                    | 32.8                   | 32.8                   | 32.8                   | 32.8                   | 32.8                                                       | 2.2                                                            | 0.45           | 0.869                              | Include                  |
| Number of comorbidities*            | 43.5                                                    | 34.4                   | 34.4                   | 34.4                   | 34.4                   | 34.4                                                       | 1.5                                                            | 0.456          | 0.873                              | Include                  |
| Current or former smoker            | 44.9                                                    | 35.9                   | 35.9                   | 35.9                   | 35.9                   | 35.9                                                       | 0.1                                                            | 0.472          | 0.879                              | Exclude                  |
| Abdominal pain and/or distention    | 44.6                                                    | 35.8                   | 35.8                   | 35.8                   | 35.8                   | 35.8                                                       | 0.4                                                            | 0.468          | 0.877                              | Exclude                  |
| Anorexia, nausea, and/or vomiting   | 44.6                                                    | 35.8                   | 35.8                   | 35.8                   | 35.8                   | 35.8                                                       | 0.4                                                            | 0.468          | 0.877                              | Exclude                  |
| Chest pain or tightness             | 44.7                                                    | 35.8                   | 35.8                   | 35.8                   | 35.8                   | 35.8                                                       | 0.3                                                            | 0.469          | 0.878                              | Exclude                  |
| Cough                               | 44.6                                                    | 35.7                   | 35.7                   | 35.7                   | 35.7                   | 35.7                                                       | 0.4                                                            | 0.469          | 0.876                              | Exclude                  |
| Diarrhoea                           | 44.6                                                    | 35.8                   | 35.8                   | 35.8                   | 35.8                   | 35.8                                                       | 0.4                                                            | 0.468          | 0.877                              | Exclude                  |
| Fatigue                             | 44.7                                                    | 35.9                   | 35.9                   | 35.9                   | 35.9                   | 35.9                                                       | 0.3                                                            | 0.471          | 0.878                              | Exclude                  |
| Internal bleeding**                 | 44.9                                                    | 35.9                   | 35.9                   | 35.9                   | 35.9                   | 35.9                                                       | 0.1                                                            | 0.473          | 0.879                              | Exclude                  |
| Shortness of breath                 | 44.8                                                    | 35.7                   | 35.7                   | 35.7                   | 35.7                   | 35.7                                                       | 0.2                                                            | 0.469          | 0.879                              | Exclude                  |
| Glasgow Coma Scale score            | 40.8                                                    | 30.7                   | 30.7                   | 30.7                   | 30.7                   | 30.7                                                       | 4.2                                                            | 0.439          | 0.861                              | Include                  |
| Heart rate (beat/min)               | 44.6                                                    | 33.9                   | 33.9                   | 33.9                   | 33.9                   | 33.9                                                       | 0.4                                                            | 0.466          | 0.876                              | Exclude                  |
| Systolic blood pressure (mmHg)      | 42.2                                                    | 34.6                   | 34.6                   | 34.6                   | 34.6                   | 34.6                                                       | 2.8                                                            | 0.446          | 0.869                              | Include                  |
| Respiratory rate (breaths/min)      | 39.9                                                    | 26.7                   | 26.7                   | 26.7                   | 26.7                   | 26.7                                                       | 5.1                                                            | 0.419          | 0.856                              | Include                  |
| Peripheral oxygen saturation (%)*** | 36                                                      | -                      | -                      | -                      | -                      | -                                                          | 9                                                              | 0.382          | 0.839                              | Include                  |
| <b>FINAL MODEL</b>                  | 42.4                                                    | 34.2                   | 34.2                   | 34.2                   | 34.2                   | 34.2                                                       | 2.6                                                            | 0.461          | 0.868                              | -                        |

\*Some comorbidities have been collapsed into the following clinically meaningful categories:

Cardiovascular disease includes one or more of the following: atrial fibrillation, congestive heart failure, coronary artery disease, deep vein thrombosis, dilated cardiomyopathy, ischaemic heart disease, myocardial infarction, and small vessel disease.

Chronic respiratory disease includes one or more of the following: asthma, chronic obstructive pulmonary disease, and tuberculosis.

Rheumatic/connective tissue disease includes one or more of the following: gout, lupus, and rheumatoid arthritis.

Chronic neurological disease includes one or more of the following: epilepsy, haemorrhagic or ischaemic stroke, and Parkinson's disease.

\*\*Internal bleeding includes one or more of the following: gastrointestinal bleeding, haematuria, or haemoptysis.

\*\*\*Peripheral oxygen saturation obtained on room air.

**Appendix 3:** Penalised regression coefficients from LASSO regression.

| Variable                           | Level | Model for settings <i>with</i> access to pulse oximetry |                       | Model for settings <i>without</i> access to pulse oximetry |                       |
|------------------------------------|-------|---------------------------------------------------------|-----------------------|------------------------------------------------------------|-----------------------|
|                                    |       | Penalised coefficient                                   | Penalised coefficient | Penalised coefficient                                      | Penalised coefficient |
| Intercept                          | -     | -0.157                                                  | -0.354                | -0.354                                                     | -0.157                |
| Sex at birth                       | Male  | 0.117                                                   | 0.143                 | 0.143                                                      | 0.117                 |
| Age (years)                        | ≥65   | 0.113                                                   | 0.139                 | 0.139                                                      | 0.113                 |
| No. of comorbidities*              | 1     | 0.003                                                   | 0.004                 | 0.004                                                      | 0.003                 |
|                                    | ≥2    | 0.088                                                   | 0.098                 | 0.098                                                      | 0.088                 |
| Glasgow Coma Scale score           | <15   | 0.233                                                   | 0.276                 | 0.276                                                      | 0.233                 |
| Heart rate (beats/min)             | >90   | -                                                       | 0.079                 | 0.079                                                      | -                     |
| Systolic blood pressure (mmHg)     | <100  | 0.112                                                   | 0.238                 | 0.238                                                      | 0.112                 |
| Respiratory rate (breaths/min)     | 20-29 | 0.069                                                   | 0.087                 | 0.087                                                      | 0.069                 |
|                                    | ≥30   | 0.076                                                   | 0.092                 | 0.092                                                      | 0.076                 |
| Peripheral oxygen saturation (%)** | <92   | 0.304                                                   | -                     | -                                                          | 0.304                 |

\*Comorbidities are defined as follows: Alcohol use, cardiovascular disease (one or more of the following: atrial fibrillation, congestive heart failure, coronary artery disease, deep vein thrombosis, dilated cardiomyopathy, ischaemic heart disease, myocardial infarction, and small vessel disease), chronic respiratory disease (one or more of the

following: asthma, chronic obstructive pulmonary disease, and tuberculosis), chronic neurological disease (one or more of the following: epilepsy, haemorrhagic or ischaemic stroke, and Parkinson's disease), cirrhosis, chronic kidney disease, current or former smoker status, diabetes (types 1 and 2), hypertension, hypothyroid, and malignancy.

\*\*Peripheral oxygen saturation obtained on room air.

**Appendix 4a:** Comparison of AFEM COVID-19 Mortality Scale (AFEM-CMS) scores to case fatality rates in derivation cohort, for settings *with* access to pulse oximetry.

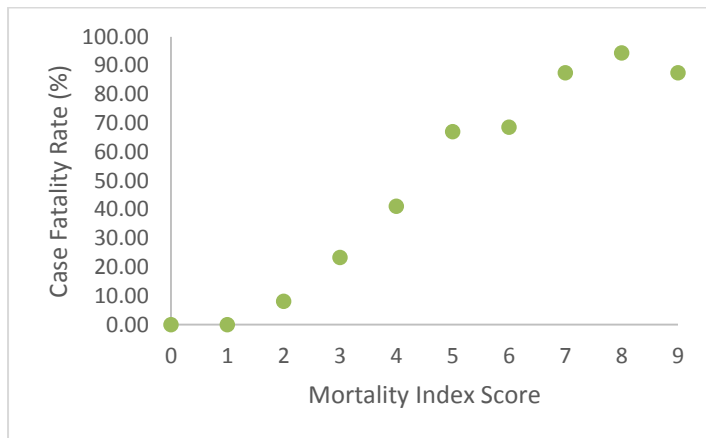

**Appendix 4b:** Comparison of AFEM COVID-19 Mortality Scale (AFEM-CMS) scores to case fatality rates in derivation cohort, for settings *without* access to pulse oximetry.

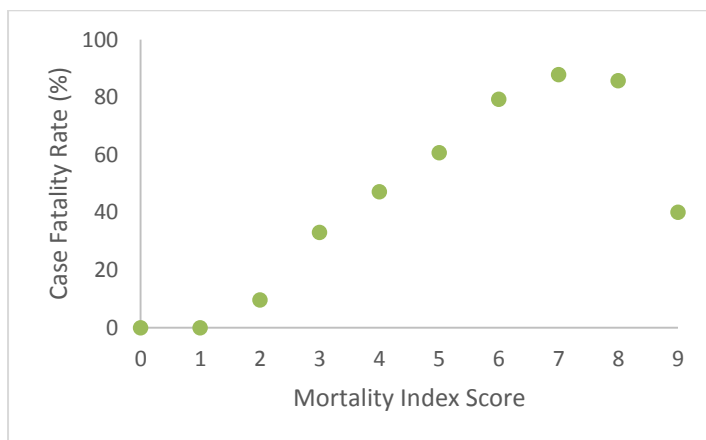



## Appendices references

1. **Miyashita N, Matsushima T, Oka M, Japanese Respiratory S.** The JRS guidelines for the management of community-acquired pneumonia in adults: An update and new recommendations. *Intern Med.* 2006;45(7):419–428.
2. **Zou X, Li S, Fang M,** et al. Acute Physiology and Chronic Health Evaluation II Score as a Predictor of Hospital Mortality in Patients of Coronavirus Disease 2019. *Crit Care Med.* 2020;48(8):e657–e665.
3. **Liang W, Liang H, Ou L,** et al. Development and Validation of a Clinical Risk Score to Predict the Occurrence of Critical Illness in Hospitalized Patients With COVID-19. *JAMA Intern Med.* 2020;180(8):1081–1089.
4. **Satici C, Demirkol MA, Sargin Altunok E,** et al. Performance of pneumonia severity index and CURB-65 in predicting 30-day mortality in patients with COVID-19. *Int J Infect Dis.* 2020;98:84–89.
5. **Wellbelove Z, Walsh C, Perinpanathan T, Lillie P, Barlow G.** Comparing the 4C mortality score for COVID-19 to established scores (CURB65, CRB65, qSOFA, NEWS) for respiratory infection patients. *J Infect.* 2020.
6. **Iijima Y, Okamoto T, Shirai T,** et al. MuLBSTA score is a useful tool for predicting COVID-19 disease behavior. *J Infect Chemother.* 2020.
7. **Fan G, Tu C, Zhou F,** et al. Comparison of severity scores for COVID-19 patients with pneumonia: A retrospective study. *Eur Respir J.* 2020;56(3).
8. **Knight SR, Ho A, Pius R,** et al. Risk stratification of patients admitted to hospital with covid-19 using the ISARIC WHO Clinical Characterisation Protocol: Development and validation of the 4C Mortality Score. *BMJ.* 2020;370:m3339.
9. **Pigoga J, Friedman A, Broccoli M,** et al. Clinical and historical features associated with severe COVID-19 infection: A systematic review and meta-analysis. Paired paper submission. 2020.

10. **Myrstad M, Ihle-Hansen H, Tveita AA**, et al. National Early Warning Score 2 (NEWS2) on admission predicts severe disease and in-hospital mortality from Covid-19 - a prospective cohort study. *Scand J Trauma Resusc Emerg Med.* 2020;28(1):66.
11. **Jang JG, Hur J, Hong KS, Lee W, Ahn JH**. Prognostic Accuracy of the SIRS, qSOFA, and NEWS for Early Detection of Clinical Deterioration in SARS-CoV-2 Infected Patients. *J Korean Med Sci.* 2020;35(25):e234.
12. **Duca A, Piva S, Foca E, Latronico N, Rizzi M**. Calculated Decisions: Brescia-COVID Respiratory Severity Scale (BCRSS)/Algorithm. *Emerg Med Pract.* 2020;22(5 Suppl):CD1-CD2.
13. **Rodriguez-Nava G, Yanez-Bello MA, Trelles-Garcia DP, Chung CW, Friedman HJ, Hines DW**. Performance of the Quick COVID-19 Severity Index and the Brescia-COVID Respiratory Severity Scale in hospitalized patients with COVID-19 in a community hospital setting. *Int J Infect Dis.* 2020.
14. **Haimovich AD, Ravindra NG, Stoytchev S**, et al. Development and Validation of the Quick COVID-19 Severity Index: A Prognostic Tool for Early Clinical Decompensation. *Ann Emerg Med.* 2020;76(4):442–453.
